# Supplementary material for: A frustrated-Lewis-pair approach to catalytic reduction of alkynes to cis-alkenes
Source: Springer Nature journal article supplement (doi:10.1038/nchem.1693), 2013-07-05
Supplement: 41557_2013_BFnchem1693_MOESM5_ESM.mol [file 41557_2013_BFnchem1693_MOESM5_ESM.mol]

  ChemDraw06211307412D

 22 23  0  0  0  0  0  0  0  0999 V2000
   -1.7016    1.5889    0.0000 C   0  0  0  0  0  0  0  0  0  0  0  0
   -1.7016    0.7639    0.0000 C   0  0  0  0  0  0  0  0  0  0  0  0
   -0.9871    0.3514    0.0000 C   0  0  0  0  0  0  0  0  0  0  0  0
   -0.2726    0.7639    0.0000 C   0  0  0  0  0  0  0  0  0  0  0  0
   -0.2726    1.5889    0.0000 C   0  0  0  0  0  0  0  0  0  0  0  0
   -0.9871    2.0014    0.0000 C   0  0  0  0  0  0  0  0  0  0  0  0
    0.5277    0.4898    0.0000 B   0  0  0  0  0  0  0  0  0  0  0  0
    0.3142   -0.4217    0.0000 C   0  0  0  0  0  0  0  0  0  0  0  0
    0.5762    1.7807    0.0000 N   0  0  0  0  0  0  0  0  0  0  0  0
    1.3913    2.4999    0.0000 C   0  0  0  0  0  0  0  0  0  0  0  0
    0.4389    2.8247    0.0000 C   0  0  0  0  0  0  0  0  0  0  0  0
    1.2422    0.0773    0.0000 H   0  0  0  0  0  0  0  0  0  0  0  0
   -0.4783   -0.6512    0.0000 C   0  0  0  0  0  0  0  0  0  0  0  0
   -0.6758   -1.4522    0.0000 C   0  0  0  0  0  0  0  0  0  0  0  0
   -0.0808   -2.0237    0.0000 C   0  0  0  0  0  0  0  0  0  0  0  0
    0.7116   -1.7942    0.0000 C   0  0  0  0  0  0  0  0  0  0  0  0
    0.9091   -0.9932    0.0000 C   0  0  0  0  0  0  0  0  0  0  0  0
   -1.0732   -0.0796    0.0000 F   0  0  0  0  0  0  0  0  0  0  0  0
   -1.4682   -1.6816    0.0000 F   0  0  0  0  0  0  0  0  0  0  0  0
   -0.2783   -2.8247    0.0000 F   0  0  0  0  0  0  0  0  0  0  0  0
    1.3066   -2.3658    0.0000 F   0  0  0  0  0  0  0  0  0  0  0  0
    1.7016   -0.7638    0.0000 F   0  0  0  0  0  0  0  0  0  0  0  0
  1  2  2  0      
  2  3  1  0      
  3  4  2  0      
  4  5  1  0      
  5  6  2  0      
  6  1  1  0      
  4  7  1  0      
  7  8  1  0      
  5  9  1  0      
  9 10  1  0      
 11  9  1  0      
  7 12  1  0      
  8 13  2  0      
 13 14  1  0      
 14 15  2  0      
 15 16  1  0      
 16 17  2  0      
 17  8  1  0      
 13 18  1  0      
 14 19  1  0      
 15 20  1  0      
 16 21  1  0      
 17 22  1  0      
M  END
